# Supplementary material for: SHP465 Mixed Amphetamine Salts in the Treatment of Attention-Deficit/Hyperactivity Disorder in Children and Adolescents: Results of a Randomized, Double-Blind Placebo-Controlled Study
Source: PubMed Central journal article supplement (PMC5771539; doi:10.1089/cap.2017.0053), 2018-10-20
Supplement: Supp_Table1.pdf [file Supp_Table1.pdf]

## Supplementary Data

SUPPLEMENTARY TABLE S1. PRIOR AND CONCOMITANT  
ATTENTION-DEFICIT/HYPERACTIVITY DISORDER  
MEDICATIONS, SAFETY ANALYSIS SET

|                                                                                                         | <i>Placebo</i><br>(n = 131) | <i>SHP465</i><br><i>MAS</i> (n = 132) |
|---------------------------------------------------------------------------------------------------------|-----------------------------|---------------------------------------|
| Prior ADHD medications used by $\geq 2\%$ of participants<br>(either treatment arm), <i>n</i> (%)       |                             |                                       |
| Methylphenidate                                                                                         | 61 (46.6)                   | 61 (46.2)                             |
| Lisdexamfetamine                                                                                        | 40 (30.5)                   | 42 (31.8)                             |
| Immediate-release MAS                                                                                   | 40 (30.5)                   | 33 (25.0)                             |
| Dexmethylphenidate hydrochloride                                                                        | 12 (9.2)                    | 19 (14.4)                             |
| Guanfacine                                                                                              | 14 (10.7)                   | 14 (10.6)                             |
| Investigational drug                                                                                    | 10 (7.6)                    | 10 (7.6)                              |
| Atomoxetine hydrochloride                                                                               | 8 (6.1)                     | 7 (5.3)                               |
| Clonidine                                                                                               | 7 (5.3)                     | 5 (3.8)                               |
| Concomitant ADHD medications used by $\geq 2\%$ of participants<br>(either treatment arm), <i>n</i> (%) |                             |                                       |
| Lisdexamfetamine                                                                                        | 7 (5.3)                     | 9 (6.8)                               |
| Immediate-release MAS                                                                                   | 9 (6.9)                     | 8 (6.1)                               |
| Methylphenidate                                                                                         | 1 (0.8)                     | 6 (4.5)                               |

ADHD, attention-deficit/hyperactivity disorder; MAS, mixed amphetamine salts.
