# Supplementary material for: SHP465 Mixed Amphetamine Salts in the Treatment of Attention-Deficit/Hyperactivity Disorder in Children and Adolescents: Results of a Randomized, Double-Blind Placebo-Controlled Study
Source: PubMed Central journal article supplement (PMC5771539; doi:10.1089/cap.2017.0053), 2018-10-20
Supplement: Supp_Table2.pdf [file Supp_Table2.pdf]

SUPPLEMENTARY TABLE S2. SUMMARY OF EFFICACY FINDINGS, FULL ANALYSIS SET

|                                                                                | Placebo             | SHP465 MAS           |
|--------------------------------------------------------------------------------|---------------------|----------------------|
| <b>ADHD-RS-IV total score</b>                                                  |                     |                      |
| Mean ± SD score at baseline*                                                   | 40.0 ± 6.96         | 39.0 ± 6.95          |
| Mean ± SD score at week 4 <sup>†</sup>                                         | 28.2 ± 13.71        | 17.3 ± 11.78         |
| LS mean (95% CI) change at week 4 <sup>†</sup>                                 | -10.8 (-13.0, -8.5) | -20.7 (-22.9, -18.5) |
| LS mean (95% CI) treatment difference at week 4 <sup>†</sup>                   |                     | -9.9 (-13.0, -6.8)   |
| <i>p</i> -Value (degrees of freedom, <i>t</i> -statistic) <sup>§</sup>         |                     | <0.001 (241, -6.23)  |
| Effect size <sup>e</sup>                                                       |                     | 0.80                 |
| <b>ADHD-RS-IV hyperactivity/impulsivity subscale score</b>                     |                     |                      |
| Mean ± SD score at baseline*                                                   | 17.9 ± 5.52         | 17.0 ± 5.86          |
| Mean ± SD score at week 4 <sup>†</sup>                                         | 12.8 ± 7.71         | 7.1 ± 6.24           |
| LS mean (95% CI) change at week 4 <sup>†</sup>                                 | -4.5 (-5.6, -3.4)   | -9.5 (-10.6, -8.4)   |
| LS mean (95% CI) treatment difference at week 4 <sup>†</sup>                   |                     | -4.9 (-6.5, -3.4)    |
| Nominal <i>p</i> -value (degrees of freedom, <i>t</i> -statistic) <sup>§</sup> |                     | <0.001 (241, -6.25)  |
| Effect size <sup>e</sup>                                                       |                     | 0.81                 |
| <b>ADHD-RS-IV inattentiveness subscale score</b>                               |                     |                      |
| Mean ± SD score at baseline*                                                   | 22.1 ± 3.57         | 22.0 ± 3.20          |
| Mean ± SD score at week 4 <sup>†</sup>                                         | 15.4 ± 7.33         | 10.2 ± 6.52          |
| LS mean (95% CI) change at week 4 <sup>†</sup>                                 | -6.2 (-7.5, -5.0)   | -11.2 (-12.5, -10.0) |
| LS mean (95% CI) treatment difference at week 4 <sup>†</sup>                   |                     | -5.0 (-6.7, -3.2)    |
| Nominal <i>p</i> -value (degrees of freedom, <i>t</i> -statistic) <sup>§</sup> |                     | <0.001 (239, -5.62)  |
| Effect size <sup>e</sup>                                                       |                     | 0.72                 |
| <b>CGI-I score</b>                                                             |                     |                      |
| Mean ± SD score at week 1*                                                     | 3.5 ± 0.82          | 2.9 ± 1.08           |
| Mean ± SD score at week 4 <sup>‡</sup>                                         | 2.9 ± 1.20          | 2.1 ± 1.13           |
| LS mean (95% CI) at week 4 <sup>‡</sup>                                        | 3.0 (2.8, 3.2)      | 2.2 (2.0, 2.4)       |
| LS mean (95% CI) treatment difference at week 4 <sup>‡</sup>                   |                     | -0.8 (-1.1, -0.5)    |
| <i>p</i> -Value (degrees of freedom, <i>t</i> -statistic) <sup>§</sup>         |                     | <0.001 (242, -5.10)  |
| Effect size <sup>e</sup>                                                       |                     | 0.65                 |
| <b>CGI-I*</b>                                                                  |                     |                      |
| Improved <sup>‡</sup> at final on-treatment assessment, <i>n</i> (%)           | 47 (36.4)           | 77 (60.2)            |
| Nominal <i>p</i> -value (degrees of freedom, CMH statistic) <sup>  </sup>      |                     | <0.001 (1, 12.7799)  |

\*Based on *n* = 129 for placebo and *n* = 128 for SHP465 MAS.

<sup>†</sup>Based on *n* = 117 for placebo and *n* = 113 for SHP465 MAS.

<sup>‡</sup>Based on *n* = 117 for placebo and *n* = 112 for SHP465 MAS.

<sup>§</sup>Based on LS mean treatment difference from placebo; mixed-effects model for repeated measures analysis included treatment group, visit, age group, interaction of the treatment group × visit as factors, baseline score as a covariate, and an adjustment for the interaction of the baseline score × visit.

<sup>e</sup>The difference in LS means divided by the estimated standard deviation from the unstructured covariance matrix.

<sup>‡</sup>Improved categorized as scores of 1 (very much improved) and 2 (much improved).

<sup>||</sup>Based on the Cochran-Mantel-Haenszel test stratified by age group and baseline CGI-Severity score.

ADHD, attention-deficit/hyperactivity disorder; ADHD-RS-IV, ADHD Rating Scale IV; CGI-I, Clinical Global Impressions-Improvement; CI, confidence interval; CMH, Cochran-Mantel-Haenszel; FAS, full analysis set; LS, least squares; MAS, mixed amphetamine salts; SD, standard deviation.
